# Supplementary material for: Artemisia Iwayomogi Extract Attenuates High-Fat Diet-Induced Hypertriglyceridemia in Mice: Potential Involvement of the Adiponectin-AMPK Pathway and Very Low Density Lipoprotein Assembly in the Liver
Source: PubMed Central journal article supplement (PMC5578151; doi:10.3390/ijms18081762), 2017-08-12
Supplement: ijms-18-01762-s001.pdf [file ijms-18-01762-s001.pdf]

**Table S1.** Primer sequences and RT-PCR conditions.

| <b>Gene Description</b>                                                                     | <b>Primers</b> | <b>Sequences (5'→3')</b> | <b>T<sub>m</sub> (°C)</b> | <b>Size (bp)</b> |
|---------------------------------------------------------------------------------------------|----------------|--------------------------|---------------------------|------------------|
| Peroxisome proliferator-activated receptor $\gamma$ (PPAR $\gamma$ )                        | F              | TTCGGAATCAGCTCTGTGGA     | 55                        | 142              |
|                                                                                             | R              | CCATTGGGTCAGCTCTTGTG     |                           |                  |
| Cluster of differentiation 36 (CD36)                                                        | F              | TTAGTAGAACCGGGCCACGT     | 55                        | 116              |
|                                                                                             | R              | CACAGTTCCGATCACAGCCC     |                           |                  |
| Liver Fatty acid binding protein 1 (FABP)                                                   | F              | CCAGGAGAACTTTGAGCCATTC   | 55                        | 71               |
|                                                                                             | R              | TGTCCTTCCCTTTCTGGATGA    |                           |                  |
| Liver X receptor (LXR $\alpha$ )                                                            | F              | ATGAGACCAGCAAAGCCCTC     | 55                        | 117              |
|                                                                                             | R              | AGTTAGAGGAGCCGAAGGGT     |                           |                  |
| Sterol regulatory element binding transcription factor 1 (SREBP1c)                          | F              | TGTCACTAGCATGCCCAAG      | 55                        | 127              |
|                                                                                             | R              | CTGTCTACCCCCAGCATAG      |                           |                  |
| ATP citrate lyase (ACL)                                                                     | F              | TCACATGACGGCCATTGTGG     | 60                        | 192              |
|                                                                                             | R              | GCTGGCTTGGCTTTCTTTGC     |                           |                  |
| Acetyl-CoA carboxylase (ACC)                                                                | F              | GCCATTGGTATTGGGGCTTAC    | 65                        | 112              |
|                                                                                             | R              | CCCGACCAAGGACTTTGTTG     |                           |                  |
| Fatty acid synthase (FAS)                                                                   | F              | TCAGCAACACATCTCACGCC     | 55                        | 154              |
|                                                                                             | R              | GTCTGCTCCTTGGGCTTGTC     |                           |                  |
| Hepatic triglyceride lipase (HTGL)                                                          | F              | GCTGCCACTTCTGGAACTC      | 55                        | 192              |
|                                                                                             | R              | TGCAGCTCAGGCATAGACCT     |                           |                  |
| Acyl CoA synthetase (ACS)                                                                   | F              | ATCTGGTGGAAACGAGGCAAG    | 55                        | 158              |
|                                                                                             | R              | TCCTTTGGGGTTGCCTGTAG     |                           |                  |
| Peroxisome proliferator-activated receptor $\alpha$ (PPAR $\alpha$ )                        | F              | TGGGGATGAAGAGGGCTGAG     | 55                        | 197              |
|                                                                                             | R              | ACGCAACGTAGAGTGCTGTG     |                           |                  |
| peroxisome-proliferator-activated receptor $\gamma$ coactivator-1 $\alpha$ (PGC1 $\alpha$ ) | F              | AACCAGTACAACAATGAGCC     | 55                        | 141              |
|                                                                                             | R              | TGTCAGTGCATCAAATGAGG     |                           |                  |
| Carnitine palmitoyl transferase 1 (CPT1)                                                    | F              | CATGTATCGCCGAAACTGG      | 55                        | 114              |
|                                                                                             | R              | CCTGGGATGCGTGTAGTGT      |                           |                  |
| Nuclear respiratory factor 1 (NRF1)                                                         | F              | AAGCGATTGTA CTCTGCATC    | 58                        | 111              |
|                                                                                             | R              | CTCCAGGATCATGCTCTTG      |                           |                  |
| Mitochondrial transcription factor A (TFAM)                                                 | F              | TCGGAGCTCAGTCTGGGAAG     | 58                        | 198              |
|                                                                                             | R              | AACACCTCCCCGATCCTCTG     |                           |                  |
| Glycerol-3-phosphate acyltransferase (GPAT)                                                 | F              | GCACATTCTTTCACCCCCA      | 60                        | 163              |
|                                                                                             | R              | GCCTAGGTCGAAATCGCGAG     |                           |                  |
| Glycerol-3-phosphate dehydrogenase (GPDH)                                                   | F              | CGCCTGGCCTTTCTCAATGT     | 60                        | 197              |
|                                                                                             | R              | GGCAGCAGGCTGATTCAGT      |                           |                  |
| Phosphatidate phosphohydrolase (PAP)                                                        | F              | CGAGACCCAATCCCTGACCT     | 60                        | 126              |
|                                                                                             | R              | GCAGGTTCCCTGACTGTCAGC    |                           |                  |
| Diacylglycerol acyltransferase (DGAT)                                                       | F              | GGCTGCTGCTACATGTGGTT     | 60                        | 163              |
|                                                                                             | R              | CACCACAGGTTGACATCCCG     |                           |                  |
| Microsomal triglyceride transfer protein (MTTP)                                             | F              | ATCGGGTGGCTGTGGTGATA     | 55                        | 161              |
|                                                                                             | R              | AGCCTTGTCCATCTGCATGC     |                           |                  |
| Protein disulfide isomerase (PDI)                                                           | F              | GGTCGGCGAGTGCTCTG        | 55                        | 178              |
|                                                                                             | R              | TCCTCCTCAGTGGCATTCT      |                           |                  |
| Apolipoprotein CIII (ApoCIII)                                                               | F              | CTACTCCAGGTAATGCCCTG     | 58                        | 118              |

|                                                     |   |                       |    |     |
|-----------------------------------------------------|---|-----------------------|----|-----|
|                                                     | R | CGTACCATGAGTCCCAAGCC  |    |     |
|                                                     | F | TGTCTCAGCCTCTTCTCATT  |    |     |
| Tumor necrosis factor $\alpha$ (TNF $\alpha$ )      | R | AGATGATCTGAGTGTGAGGG  | 55 | 156 |
|                                                     | F | CCCCAATTCCAATGCTCTCC  |    |     |
| Interleukin 6 (IL-6)                                | R | CGCACTAGGTTTGCCGAGTA  | 58 | 141 |
|                                                     | F | AGAGAGGCCCTATCCCAACTC |    |     |
| Glyceraldehyde-3-phosphate<br>dehydrogenase (GAPDH) | R | CCTCCCCATACACACCCTCC  | 55 | 193 |

---
